# Supplementary material for: Assessment of Care Cascades Following Low-Value Prostate-Specific Antigen Testing Among Veterans Dually Enrolled in the US Veterans Health Administration and Medicare Systems
Source: PubMed Central journal article supplement (PMC9856440; doi:10.1001/jamanetworkopen.2022.47180), 2022-12-15
Supplement: jamanetwopen-e2247180-s001.pdf [file jamanetwopen-e2247180-s001.pdf]

## Supplementary Online Content

Pickering AN, Zhao X, Sileanu FE, et al. Assessment of care cascades following low-value prostate-specific antigen testing among veterans dually enrolled in the US Veterans Health Administration and Medicare systems. *JAMA Netw Open*. 2022;5(12):e2247180. doi:10.1001/jamanetworkopen.2022.47180

**eTable 1.** Cohort Inclusion and Exclusion Criteria, Index Low-Value Prostate-Specific Antigen Testing, and Potential Cascade Services With Relevant Administrative Codes

**eMethods.** Generation of Inverse Probability of Treatment Weights

**eTable 2.** Standardized Mean Differences for Baseline Patient- and Facility-Level Characteristics Between Veterans Who Underwent Low-Value Prostate-Specific Antigen Testing Within the US Veterans Health Administration and Those Who Did Not Undergo Low-Value PSA Testing Before and After Inverse Probability of Treatment Weighting

**eTable 3.** Standardized Mean Differences for Baseline Patient- and Facility-Level Characteristics Between Veterans Who Underwent Low-Value Prostate-Specific Antigen Testing Within Medicare and Those Who Did Not Undergo Low-Value PSA Testing Before and After Inverse Probability of Treatment Weighting

**eTable 4.** Standardized Mean Differences for Baseline Patient- and Facility-Level Characteristics Between Veterans Who Underwent Low-Value Prostate-Specific Antigen Testing Within the US Veterans Health Administration and Medicare Before and After Inverse Probability of Treatment Weighting

**eTable 5.** Difference in Use of Potential Cascade Services in Veterans Aged Older than 83 Years Who Received Low-Value Prostate-Specific Antigen Testing Within the US Veterans Health Administration Versus Those Who Did Not Receive Low-Value PSA Testing

**eTable 6.** Difference in Use of Potential Cascade Services in Veterans Aged Older than 83 Years Who Received Low-Value Prostate-Specific Antigen Testing Within Medicare Versus Those Who Did Not Receive Low-Value PSA Testing

**eTable 7.** Difference in Use of Potential Cascade Services in Veterans Aged Older than 83 Years Who Received Low-Value Prostate-Specific Antigen Testing Within Medicare Versus Those Who Received Low-Value PSA Testing Within the US Veterans Health Administration

**eTable 8.** Rates of Potential Cascade Services After Low-Value Prostate-Specific Antigen Testing by Health Care System

This supplementary material has been provided by the authors to give readers additional information about their work.

**eTable 1.** Cohort Inclusion and Exclusion Criteria, Index Low-Value Prostate-Specific Antigen Testing, and Potential Cascade Services With Relevant Administrative Codes

| Inclusion criteria                                                                                                                                                                     | Exclusion criteria                                                                                                                                                                                                                                                                                                                                                                                                                                                                                                                                                                                                                                                                                                                                                                                                                                                                              | Index low-value PSA test            | Potential cascade services                                                  |
|----------------------------------------------------------------------------------------------------------------------------------------------------------------------------------------|-------------------------------------------------------------------------------------------------------------------------------------------------------------------------------------------------------------------------------------------------------------------------------------------------------------------------------------------------------------------------------------------------------------------------------------------------------------------------------------------------------------------------------------------------------------------------------------------------------------------------------------------------------------------------------------------------------------------------------------------------------------------------------------------------------------------------------------------------------------------------------------------------|-------------------------------------|-----------------------------------------------------------------------------|
| <p>(1) Male<br/>                     (2) Aged ≥ 75<br/>                     (3) At least one outpatient primary care or urology visit in VHA or Medicare in the first half of FY18</p> | <p>History of the following within one year prior to the date of the index PSA test or index outpatient visit:</p> <p>(1) Prostate cancer<br/> <u>ICD-10</u>: C61, Z85.46, D29.1, D07.5, D40.0</p> <p>(2) Elevated PSA test<br/> <u>ICD-10</u>: R97.20, R97.21</p> <p>(3) Prostatectomy<br/> <u>CPT</u>: 725801, 55810, 55812, 55815, 55840, 55842, 55845, 55866</p> <p>(4) Radiation therapy<br/> <u>CPT</u>: 77401-2, 77407, 77412, 77417, 77423, 77424, 77425, 77427, 77431, 77432, 77435, 77469, 77470, 77499, 77750, 77761, 77762, 77763, 77767, 77768, 77770, 77771, 77772, 77778, 77789, 77790, 77799</p> <p>(5) Androgen deprivation therapy<br/> <u>CPT</u>: 54520, 54522 (surgical)<br/> <u>HCPCS</u>: J1950, J9217, J9218, J9219, J3315, J9202 (medical)</p> <p>(4) Urology visit<br/> <u>Stop code</u> (VHA data): 414<br/> <u>Physician specialty code</u> (Medicare data): 34</p> | <p><u>CPT</u>: G1012-3, 84152-3</p> | <p>PSA test</p> <p><u>CPT</u>: G1012-3, 84152-3</p>                         |
|                                                                                                                                                                                        |                                                                                                                                                                                                                                                                                                                                                                                                                                                                                                                                                                                                                                                                                                                                                                                                                                                                                                 |                                     | <p>Outpatient visit or consultation for elevated PSA or prostate cancer</p> |

|  |  |  |                                                                                                                                                                                                                                                                                                                                                                                                |
|--|--|--|------------------------------------------------------------------------------------------------------------------------------------------------------------------------------------------------------------------------------------------------------------------------------------------------------------------------------------------------------------------------------------------------|
|  |  |  | <p><u>CPT</u>: 99201-5, 99211-5<br/>(outpatient visit or consultation)</p> <p>Associated with primary diagnosis of<br/> <u>ICD-10</u>: C61, Z85.46 (malignant neoplasm of prostate)<br/> D29.1 (benign neoplasm of prostate)<br/> D07.5 (carcinoma in situ of prostate)<br/> R97.20-1 (elevated PSA)</p> <p>*Excluding those visits associated with administrative codes for urology visit</p> |
|  |  |  | <p>Outpatient visit to urologist</p> <p><u>CPT</u>: 99201-5, 99211-5<br/>(outpatient visit or consultation)</p> <p>Associated with <u>Stop code</u>: 414 (urology) for VHA data or<br/> <u>Physician specialty code</u>: 34 for Medicare data</p>                                                                                                                                              |
|  |  |  | <p>Prostate imaging</p> <p><u>CPT</u>: 76872-3 (Transrectal US)<br/> 72192-4 (CT pelvis)<br/> 72195-7 (MRI pelvis)<br/> 78300-78305, 78306, 78315,<br/> 78350-1, 78399 (bone scan)</p> <p>*No current CPT codes for prostate MRI</p>                                                                                                                                                           |
|  |  |  | <p>Prostate biopsy</p> <p><u>CPT</u>: 55700, 55705, 55706</p> <p>HCPCS: G0416</p>                                                                                                                                                                                                                                                                                                              |

|  |  |  |                                                                                                                                                                                                                                                                                                                                          |
|--|--|--|------------------------------------------------------------------------------------------------------------------------------------------------------------------------------------------------------------------------------------------------------------------------------------------------------------------------------------------|
|  |  |  | <p>Androgen deprivation therapy</p> <p><u>CPT</u>: 54520, 54522 (surgical)</p> <p><u>HCPCS</u>: J1950, J9217, J9218, J9219, J3315, J9202 (medical)</p>                                                                                                                                                                                   |
|  |  |  | <p>Surgical procedure</p> <p><u>CPT</u>: 55801 (excision procedures on prostate)<br/>55810, 55812, 55815, 55821, 55831, 55840, 55842, 55845 (prostatectomy)<br/>55866 (laparoscopic procedures on the prostate)</p>                                                                                                                      |
|  |  |  | <p>Radiation therapy</p> <p><u>CPT</u>: 77401-2, 77407, 77412, 77417, 77423, 77424, 77425, 77427, 77431, 77432, 77435, 77469, 77470, 77499, 77750, 77761, 77762, 77763, 77767, 77768, 77770, 77771, 77772, 77778, 77789, 77790, 77799 (radiation therapy)</p> <p>With primary diagnosis of prostate cancer during the outcome period</p> |

## **eMethods.** Generation of Inverse Probability of Treatment Weights

To generate the stabilized IPTWs, we created three separate multivariable logistic regression models to estimate the predicted probability of each Veteran having received their respective “treatments” (i.e., PSA testing within VHA or no PSA testing, PSA testing within Medicare or no PSA testing, PSA testing within VHA or PSA testing with Medicare) based on the observed covariates and converted these probabilities to stabilized IPTWs. We then applied the weights to the negative binomial models and calculated the difference in adjusted rates of each individual cascade service between the VHA PSA group and the control group, the Medicare PSA group and the control group and the VHA PSA group and the Medicare PSA group.

**eTable 2.** Standardized Mean Differences for Baseline Patient- and Facility-Level Characteristics Between Veterans Who Underwent Low-Value Prostate-Specific Antigen Testing Within the US Veterans Health Administration and Those Who Did Not Undergo Low-Value PSA Testing Before and After Inverse Probability of Treatment Weighting<sup>a</sup>

|                                                           | Unweighted               |                           |                  | Weighted <sup>b</sup>    |                           |                  |
|-----------------------------------------------------------|--------------------------|---------------------------|------------------|--------------------------|---------------------------|------------------|
|                                                           | VHA PSA Group (n=36,459) | Control Group (n=245,953) | SMD <sup>c</sup> | VHA PSA Group (n=36,459) | Control Group (n=245,953) | SMD <sup>c</sup> |
| <b>Patient-level characteristics</b>                      |                          |                           |                  |                          |                           |                  |
| Age, y, mean (SD)                                         | 80.0 (4.7)               | 83.1 (5.6)                | 0.60             | 83.0 (6.0)               | 82.7 (5.6)                | 0.06             |
| Race/ethnicity, n (%)                                     |                          |                           |                  |                          |                           |                  |
| Hispanic                                                  | 1170 (3.2)               | 7126 (2.9)                | 0.02             | 1055.2 (2.9)             | 7218.7 (2.9)              | 0.00             |
| Non-Hispanic black                                        | 2653 (7.3)               | 16426 (6.7)               | 0.02             | 2571.9 (7.1)             | 16627.7 (6.8)             | 0.01             |
| Non-Hispanic other + Multiracial                          | 812 (2.2)                | 5853 (2.4)                | 0.01             | 827.6 (2.3)              | 5802.1 (2.4)              | 0.01             |
| Non-Hispanic white                                        | 31824 (87.3)             | 216548 (88.0)             | ref              | 32,004.3 (87.8)          | 216304.5 (88.0)           | ref              |
| VA priority group <sup>d</sup> , n (%)                    |                          |                           |                  |                          |                           |                  |
| 1                                                         | 7716 (21.2)              | 46470 (18.9)              | ref              | 7051.6 (19.3)            | 47209.0 (19.2)            | ref              |
| 2                                                         | 2247 (6.2)               | 14590 (5.9)               | 0.03             | 2101.7 (5.8)             | 14656.9 (6.0)             | 0.02             |
| 3                                                         | 4389 (12.0)              | 27851 (11.3)              | 0.03             | 4126.2 (11.3)            | 28076.7 (11.4)            | 0.01             |
| 4                                                         | 626 (1.7)                | 7777 (3.2)                | 0.22             | 1171.6 (3.2)             | 7322.6 (3.0)              | 0.02             |
| 5                                                         | 8369 (23.0)              | 56590 (23.0)              | 0.06             | 8413.6 (23.1)            | 56584.0 (23.0)            | 0.00             |
| 6                                                         | 866 (2.4)                | 3754 (1.5)                | 0.09             | 576.3 (1.6)              | 4019.6 (1.6)              | 0.01             |
| 7                                                         | 1155 (3.2)               | 10588 (4.3)               | 0.15             | 1602.9 (4.4)             | 10231.5 (4.2)             | 0.02             |
| 8                                                         | 11091 (30.4)             | 78333 (31.9)              | 0.08             | 11415.0 (31.3)           | 77852.6 (31.7)            | 0.01             |
| Driving distance to nearest VA facility, miles, mean (SD) | 18.8 (18.8)              | 16.8 (16.6)               | 0.11             | 16.8 (17.2)              | 17.1 (16.9)               | 0.02             |
| Number of Elixhauser conditions, mean (SD)                | 2.3 (2.1)                | 2.8 (2.3)                 | 0.24             | 2.8 (2.4)                | 2.8 (2.3)                 | 0.02             |
| HIV/AIDS, n (%)                                           | 37 (0.1)                 | 207 (0.1)                 | 0.01             | 33.1 (0.1)               | 213.3 (0.1)               | 0.00             |
| Alcohol use disorder                                      | 446 (1.2)                | 3256 (1.3)                | 0.01             | 456.1 (1.3)              | 3224.4 (1.3)              | 0.01             |
| Iron-deficiency anemia                                    | 4092 (11.2)              | 40747 (16.6)              | 0.15             | 6081.9 (16.7)            | 39073.2 (15.9)            | 0.02             |
| Rheumatoid/collagen-vascular disease                      | 1018 (2.8)               | 7496 (3.1)                | 0.02             | 1085.2 (3.0)             | 7413.1 (3.0)              | 0.00             |

|                                      | Unweighted               |                           |                  | Weighted <sup>b</sup>    |                           |                  |
|--------------------------------------|--------------------------|---------------------------|------------------|--------------------------|---------------------------|------------------|
|                                      | VHA PSA Group (n=36,459) | Control Group (n=245,953) | SMD <sup>c</sup> | VHA PSA Group (n=36,459) | Control Group (n=245,953) | SMD <sup>c</sup> |
| <b>Patient-level characteristics</b> |                          |                           |                  |                          |                           |                  |
| Blood loss anemia                    | 240 (0.7)                | 2557 (1.0)                | 0.04             | 398.2 (1.1)              | 2437.7 (1.0)              | 0.01             |
| Congestive heart failure             | 3602 (9.9)               | 37165 (15.1)              | 0.16             | 5431.7 (14.9)            | 35519.2 (14.4)            | 0.01             |
| Chronic pulmonary disease            | 6312 (17.3)              | 49576 (20.2)              | 0.07             | 7319.0 (20.1)            | 48688.9 (19.8)            | 0.01             |
| Coagulation deficiency               | 928 (2.6)                | 9298 (3.8)                | 0.07             | 1313.9 (3.6)             | 8907.6 (3.6)              | 0.00             |
| Depression                           | 2665 (7.3)               | 20650 (8.4)               | 0.04             | 3014.5 (8.3)             | 20307.0 (8.3)             | 0.00             |
| Diabetes without chronic conditions  | 4867 (13.4)              | 31515 (12.8)              | 0.02             | 4783.8 (13.1)            | 31698.1 (12.9)            | 0.01             |
| Diabetes with chronic conditions     | 7064 (19.4)              | 55320 (22.5)              | 0.08             | 8103.0 (22.2)            | 54334.7 (22.1)            | 0.00             |
| Drug abuse                           | 151 (0.4)                | 838 (0.3)                 | 0.01             | 127.8 (0.4)              | 862.1 (0.4)               | 0.00             |
| Uncomplicated hypertension           | 18699 (51.3)             | 132740 (54.0)             | 0.05             | 19586.0 (53.7)           | 131899.8 (53.6)           | 0.00             |
| Complicated hypertension             | 4589 (12.6)              | 43349 (17.6)              | 0.14             | 6398.9 (17.6)            | 41769.3 (17.0)            | 0.02             |
| Hypothyroidism                       | 3836 (10.5)              | 32124 (13.1)              | 0.08             | 4790.2 (13.1)            | 31334.5 (12.7)            | 0.01             |
| Liver disease                        | 516 (1.4)                | 3824 (1.6)                | 0.01             | 548.3 (1.5)              | 3781.1 (1.5)              | 0.00             |
| Lymphoma                             | 389 (1.1)                | 2982 (1.2)                | 0.01             | 481.3 (1.3)              | 2940.2 (1.2)              | 0.01             |
| Fluid and electrolyte disorder       | 2416 (6.6)               | 23796 (9.7)               | 0.11             | 3453.5 (9.5)             | 22839.5 (9.3)             | 0.01             |
| Metastatic cancer                    | 150 (0.4)                | 1454 (0.6)                | 0.03             | 251.1 (0.7)              | 1398.7 (0.6)              | 0.02             |
| Other neurologic disorder            | 2842 (7.8)               | 28685 (11.7)              | 0.13             | 4096.2 (11.2)            | 27458.1 (11.2)            | 0.00             |
| Obesity                              | 3147 (8.6)               | 21019 (8.6)               | 0.00             | 3107.6 (8.5)             | 21047.9 (8.6)             | 0.00             |
| Paralysis                            | 491 (1.4)                | 4420 (1.8)                | 0.04             | 624.0 (1.7)              | 4278.1 (1.7)              | 0.00             |
| Peripheral vascular disease          | 4327 (11.9)              | 39846 (16.2)              | 0.12             | 5902.7 (16.2)            | 38482.4 (15.7)            | 0.01             |
| Psychosis                            | 600 (1.7)                | 4659 (1.9)                | 0.02             | 704.2 (1.9)              | 4581.6 (1.9)              | 0.01             |
| Pulmonary circulation disorder       | 415 (1.1)                | 3594 (1.5)                | 0.03             | 540.4 (1.5)              | 3493.1 (1.4)              | 0.01             |
| Renal failure                        | 4586 (12.6)              | 46073 (18.7)              | 0.17             | 6814.3 (18.7)            | 44140.5 (18.0)            | 0.02             |
| Solid tumor without metastasis       | 1140 (3.1)               | 8702 (3.5)                | 0.02             | 1306.3 (3.6)             | 8571.1 (3.5)              | 0.01             |

|                                                          | Unweighted               |                           |                  | Weighted <sup>b</sup>    |                           |                  |
|----------------------------------------------------------|--------------------------|---------------------------|------------------|--------------------------|---------------------------|------------------|
|                                                          | VHA PSA Group (n=36,459) | Control Group (n=245,953) | SMD <sup>c</sup> | VHA PSA Group (n=36,459) | Control Group (n=245,953) | SMD <sup>c</sup> |
| <b>Patient-level characteristics</b>                     |                          |                           |                  |                          |                           |                  |
| Peptic ulcer disease                                     | 224 (0.6)                | 1978 (0.8)                | 0.02             | 286.6 (0.8)              | 1916.1 (0.8)              | 0.00             |
| Valvular disease                                         | 2910 (8.0)               | 27728 (11.3)              | 0.11             | 4054.1 (11.1)            | 26688.1 (10.9)            | 0.01             |
| Weight loss                                              | 688 (1.9)                | 7586 (3.1)                | 0.08             | 1170.6 (3.2)             | 7209.3 (2.9)              | 0.02             |
| <b>Facility-level characteristics</b>                    |                          |                           |                  |                          |                           |                  |
| Academic affiliation, yes, n (%)                         | 35663 (97.8)             | 240547 (97.8)             | 0.00             | 35659.8 (97.8)           | 240548.3 (97.8)           | 0.00             |
| Facility size, total # outpatient visits FY18, mean (SD) | 755774 (437479)          | 740286 (395187)           | 0.04             | 742368.9 (408548.3)      | 742218 (398369.6)         | 0.00             |
| Census region, n (%)                                     |                          |                           |                  |                          |                           |                  |
| Northeast                                                | 3502 (9.6)               | 41194 (16.8)              | ref              | 6105.3 (16.8)            | 38948.3 (15.8)            | ref              |
| Midwest                                                  | 8402 (23.1)              | 61568 (25.0)              | 0.23             | 8771.6 (24.1)            | 60915.4 (24.8)            | 0.04             |
| South                                                    | 17752 (48.7)             | 96544 (39.3)              | 0.32             | 14677.1 (40.3)           | 99543.3 (40.5)            | 0.03             |
| West                                                     | 6803 (18.7)              | 46647 (19.0)              | 0.27             | 6905.0 (18.9)            | 46546.0 (18.9)            | 0.03             |
| Rurality, n (%)                                          |                          |                           |                  |                          |                           |                  |
| Large metropolitan                                       | 9938 (27.3)              | 84832 (34.5)              | ref              | 12543.7 (34.4)           | 82642.3 (33.6)            | ref              |
| Small metropolitan                                       | 14582 (40.0)             | 93055 (37.9)              | 0.14             | 13782.6 (37.8)           | 93897.0 (38.2)            | 0.02             |
| Micropolitan                                             | 6222 (17.1)              | 38005 (15.5)              | 0.16             | 5652.4 (15.5)            | 38560.6 (15.7)            | 0.02             |
| Noncore rural                                            | 5687 (15.6)              | 29713 (12.1)              | 0.23             | 4480.4 (12.3)            | 30853.1 (12.5)            | 0.02             |
| Facility complexity level <sup>e</sup> ,n (%)            |                          |                           |                  |                          |                           |                  |
| High complexity                                          | 26709 (73.3)             | 188152 (76.5)             | ref              | 28163.9 (77.3)           | 187173.3 (76.1)           | ref              |
| Medium complexity                                        | 4587 (12.6)              | 29385 (12.0)              | 0.03             | 4122.0 (11.3)            | 29555.2 (12.0)            | 0.03             |
| Low complexity                                           | 5163 (14.2)              | 28416 (11.6)              | 0.09             | 4173.0 (11.5)            | 29224.5 (11.9)            | 0.02             |

<sup>a</sup>Missing values for race/ethnicity, VA priority group, driving distance to nearest VA facility, census region, rurality generated using single imputation

<sup>b</sup>Descriptive statistics and SMD after applying inverse probability of treatment weight

<sup>c</sup>SMD for categorical variables with >2 levels represented using sets of binary indicator variables (34)

<sup>d</sup>Veterans are assigned to 1 of 8 priority groups at VA enrollment based on service-connected illnesses, era of Service, and socioeconomic status determined by means testing. Priority group determines level of co-payment.

<sup>e</sup>The complexity rating is based on a VAMC's patient volume, number and breadth of physician specialists, patient case mix, intensive care unit capabilities, and degree of teaching and research.



**eTable 3.** Standardized Mean Differences for Baseline Patient- and Facility-Level Characteristics Between Veterans Who Underwent Low-Value Prostate-Specific Antigen Testing Within Medicare and Those Who Did Not Undergo Low-Value PSA Testing Before and After Inverse Probability of Treatment Weighting<sup>a</sup>

|                                                           | Unweighted                    |                           |                  | Weighted <sup>b</sup>         |                           |                  |
|-----------------------------------------------------------|-------------------------------|---------------------------|------------------|-------------------------------|---------------------------|------------------|
|                                                           | Medicare PSA Group (n=17,981) | Control Group (n=245,953) | SMD <sup>c</sup> | Medicare PSA Group (n=17,981) | Control Group (n=245,953) | SMD <sup>c</sup> |
| <b>Patient-level characteristics</b>                      |                               |                           |                  |                               |                           |                  |
| Age, y, mean (SD)                                         | 81.3 (5.2)                    | 83.1 (5.6)                | 0.33             | 83.2 (5.7)                    | 83.0 (5.6)                | 0.03             |
| Race/ethnicity, n (%)                                     |                               |                           |                  |                               |                           |                  |
| Hispanic                                                  | 464 (2.6)                     | 7126 (2.9)                | 0.02             | 530.6 (3.0)                   | 7073.0 (2.9)              | 0.00             |
| Non-Hispanic black                                        | 1055 (5.9)                    | 16426 (6.7)               | 0.04             | 1184.7 (6.6)                  | 16289.1 (6.6)             | 0.00             |
| Non-Hispanic other + Multiracial                          | 423 (2.4)                     | 5853 (2.4)                | 0.00             | 435.4 (2.4)                   | 5848.8 (2.4)              | 0.00             |
| Non-Hispanic white                                        | 16039 (89.2)                  | 216548 (88.0)             | ref              | 15830.2 (88.0)                | 216742.2 (88.1)           | ref              |
| VA priority group <sup>d</sup> , n (%)                    |                               |                           |                  |                               |                           |                  |
| 1                                                         | 3500 (19.5)                   | 46470 (18.9)              | ref              | 3312.1 (18.4)                 | 46559.5 (18.9)            | ref              |
| 2                                                         | 1288 (17.2)                   | 14590 (5.9)               | 0.07             | 1047.3 (5.8)                  | 14793.7 (6.0)             | 0.00             |
| 3                                                         | 2458 (13.7)                   | 27851 (11.3)              | 0.08             | 2003.4 (11.1)                 | 28240.2 (11.5)            | 0.00             |
| 4                                                         | 282 (1.6)                     | 7777 (3.2)                | 0.22             | 576.8 (3.2)                   | 7510.8 (3.1)              | 0.03             |
| 5                                                         | 2355 (13.1)                   | 56590 (23.0)              | 0.30             | 4095.3 (22.8)                 | 54931.7 (22.30)           | 0.02             |
| 6                                                         | 550 (3.1)                     | 3754 (1.5)                | 0.20             | 283.5 (1.6)                   | 4009.2 (1.6)              | 0.00             |
| 7                                                         | 828 (4.6)                     | 10588 (4.3)               | 0.01             | 802.3 (4.5)                   | 10639.7 (4.3)             | 0.02             |
| 8                                                         | 6720 (37.4)                   | 78333 (31.9)              | 0.06             | 5860.4 (32.6)                 | 79268.3 (32.2)            | 0.02             |
| Driving distance to nearest VA facility, miles, mean (SD) | 16.6 (15.8)                   | 16.8 (16.6)               | 0.02             | 17.2 (17.0)                   | 16.8 (16.6)               | 0.02             |
| Number of Elixhauser conditions, mean (SD)                | 3.0 (2.2)                     | 2.8 (2.3)                 | 0.07             | 2.9 (2.3)                     | 2.8 (2.3)                 | 0.03             |
| HIV/AIDS, n (%)                                           | 11 (0.1)                      | 207 (0.1)                 | 0.01             | 14.1 (0.1)                    | 203.0 (0.1)               | 0.00             |
| Alcohol use disorder                                      | 194 (1.1)                     | 3256 (1.3)                | 0.02             | 238.6 (1.3)                   | 3215.4 (1.3)              | 0.00             |
| Iron-deficiency anemia                                    | 3246 (18.1)                   | 40747 (16.6)              | 0.04             | 3075.1 (17.1)                 | 41000.5 (16.7)            | 0.01             |
| Rheumatoid/collagen-vascular disease                      | 740 (4.1)                     | 7496 (3.1)                | 0.06             | 574.7 (3.2)                   | 7676.7 (3.1)              | 0.00             |

|                                      | Unweighted                    |                           |                  | Weighted <sup>b</sup>         |                           |                  |
|--------------------------------------|-------------------------------|---------------------------|------------------|-------------------------------|---------------------------|------------------|
|                                      | Medicare PSA Group (n=17,981) | Control Group (n=245,953) | SMD <sup>c</sup> | Medicare PSA Group (n=17,981) | Control Group (n=245,953) | SMD <sup>c</sup> |
| <b>Patient-level characteristics</b> |                               |                           |                  |                               |                           |                  |
| Blood loss anemia                    | 197 (1.1)                     | 2557 (1.0)                | 0.01             | 183.2 (1.0)                   | 2566.5 (1.0)              | 0.00             |
| Congestive heart failure             | 2273 (12.6)                   | 37165 (15.1)              | 0.07             | 2851.6 (15.9)                 | 36759.8 (15.0)            | 0.03             |
| Chronic pulmonary disease            | 3678 (20.5)                   | 49576 (20.2)              | 0.01             | 3757.0 (20.9)                 | 49634.7 (20.2)            | 0.02             |
| Coagulation deficiency               | 761 (4.2)                     | 9298 (3.8)                | 0.02             | 696.6 (3.9)                   | 9374.1 (3.8)              | 0.00             |
| Depression                           | 1434 (8.0)                    | 20650 (8.4)               | 0.02             | 1559.0 (8.7)                  | 20582.0 (8.4)             | 0.01             |
| Diabetes without chronic conditions  | 2486 (13.8)                   | 31515 (12.8)              | 0.03             | 2291.8 (12.8)                 | 31682.5 (12.9)            | 0.00             |
| Diabetes with chronic conditions     | 4213 (23.4)                   | 55320 (22.5)              | 0.02             | 4118.1 (22.9)                 | 55482.1 (22.6)            | 0.01             |
| Drug abuse                           | 65 (0.4)                      | 838 (0.3)                 | 0.00             | 61.5 (0.3)                    | 841.7 (0.3)               | 0.00             |
| Uncomplicated hypertension           | 11206 (62.3)                  | 132740 (54.0)             | 0.17             | 9819.4 (54.6)                 | 134141.2 (54.5)           | 0.00             |
| Complicated hypertension             | 3122 (17.4)                   | 43349 (17.6)              | 0.01             | 3271.3 (18.2)                 | 43308.1 (17.6)            | 0.02             |
| Hypothyroidism                       | 2999 (16.7)                   | 32124 (13.1)              | 0.10             | 2459.7 (13.7)                 | 32736.7 (13.3)            | 0.01             |
| Liver disease                        | 330 (1.8)                     | 3824 (1.6)                | 0.02             | 261.3 (1.5)                   | 3868.7 (1.6)              | 0.01             |
| Lymphoma                             | 231 (1.3)                     | 2982 (1.2)                | 0.01             | 222.3 (1.2)                   | 2994.9 (1.2)              | 0.00             |
| Fluid and electrolyte disorder       | 1593 (8.9)                    | 23796 (9.7)               | 0.03             | 1836.6 (10.2)                 | 23665.3 (9.6)             | 0.02             |
| Metastatic cancer                    | 94 (0.5)                      | 1454 (0.6)                | 0.01             | 109.8 (0.6)                   | 1443.0 (0.6)              | 0.00             |
| Other neurologic disorder            | 1804 (10.0)                   | 28685 (11.7)              | 0.05             | 2198.2 (12.3)                 | 28417.4 (11.6)            | 0.02             |
| Obesity                              | 2168 (12.1)                   | 21019 (8.6)               | 0.12             | 1586.7 (8.8)                  | 21606.9 (8.8)             | 0.00             |
| Paralysis                            | 279 (1.6)                     | 4420 (1.8)                | 0.02             | 354.7 (2.0)                   | 4379.9 (1.8)              | 0.02             |
| Peripheral vascular disease          | 3261 (18.1)                   | 39846 (16.2)              | 0.05             | 3053.6 (17.0)                 | 40179.3 (16.3)            | 0.02             |
| Psychosis                            | 313 (1.7)                     | 4659 (1.9)                | 0.01             | 348.6 (1.9)                   | 4633.8 (1.9)              | 0.00             |
| Pulmonary circulation disorder       | 230 (1.3)                     | 3594 (1.5)                | 0.02             | 266.2 (1.5)                   | 3564.2 (1.5)              | 0.00             |
| Renal failure                        | 3187 (17.7)                   | 46073 (18.7)              | 0.03             | 3414.7 (19.0)                 | 45905.8 (18.7)            | 0.01             |
| Solid tumor without metastasis       | 658 (3.7)                     | 8702 (3.5)                | 0.01             | 619.1 (3.4)                   | 8721.9 (3.6)              | 0.01             |

|                                                          | Unweighted                    |                           |                  | Weighted <sup>b</sup>         |                           |                  |
|----------------------------------------------------------|-------------------------------|---------------------------|------------------|-------------------------------|---------------------------|------------------|
|                                                          | Medicare PSA Group (n=17,981) | Control Group (n=245,953) | SMD <sup>c</sup> | Medicare PSA Group (n=17,981) | Control Group (n=245,953) | SMD <sup>c</sup> |
| <b>Patient-level characteristics</b>                     |                               |                           |                  |                               |                           |                  |
| Peptic ulcer disease                                     | 135 (99.3)                    | 1978 (0.8)                | 0.01             | 142.3 (0.8)                   | 1969.5 (0.8)              | 0.00             |
| Valvular disease                                         | 2180 (12.1)                   | 27728 (11.3)              | 0.03             | 2107.3 (11.7)                 | 27875.4 (11.3)            | 0.01             |
| Weight loss                                              | 393 (2.2)                     | 7586 (3.1)                | 0.06             | 587.4 (3.30)                  | 7437.1 (3.1)              | 0.01             |
| <b>Facility-level characteristics</b>                    |                               |                           |                  |                               |                           |                  |
| Academic affiliation, yes, n (%)                         | 17719 (98.5)                  | 240547 (97.8)             | 0.06             | 17605.6 (97.9)                | 240671.2 (97.9)           | 0.00             |
| Facility size, total # outpatient visits FY18, mean (SD) | 788769 (419935)               | 740286 (395187)           | 0.12             | 741462.5 (397585.7)           | 743574.1 (397094.6)       | 0.01             |
| Census region, n (%)                                     |                               |                           |                  |                               |                           |                  |
| Northeast                                                | 2917 (16.2)                   | 41194 (16.8)              | ref              | 2964.3 (16.5)                 | 41103.2 (16.7)            | ref              |
| Midwest                                                  | 3812 (21.2)                   | 61568 (25.0)              | 0.07             | 4514.3 (25.1)                 | 60930.0 (24.8)            | 0.01             |
| South                                                    | 8505 (47.3)                   | 96544 (39.3)              | 0.10             | 7199.4 (40.0)                 | 97894.2 (39.8)            | 0.01             |
| West                                                     | 2747 (15.3)                   | 46647 (19.0)              | 0.09             | 3303.1 (18.4)                 | 46025.6 (18.7)            | 0.00             |
| Rurality, n (%)                                          |                               |                           |                  |                               |                           |                  |
| Large metropolitan                                       | 6685 (37.3)                   | 84832 (34.5)              | ref              | 6291.9 (35.0)                 | 85398.1 (34.7)            | ref              |
| Small metropolitan                                       | 7031 (39.2)                   | 93055 (37.9)              | 0.02             | 6687.6 (37.20)                | 93423.8 (38.0)            | 0.01             |
| Micropolitan                                             | 2441 (13.6)                   | 38005 (15.5)              | 0.09             | 2804.1 (15.6)                 | 37743.0 (15.4)            | 0.00             |
| Noncore rural                                            | 1789 (10.0)                   | 29713 (12.1)              | 0.11             | 2197.4 (12.2)                 | 29388.1 (12.0)            | 0.01             |
| Facility complexity level <sup>e</sup> , n (%)           |                               |                           |                  |                               |                           |                  |
| High complexity                                          | 14161 (78.8)                  | 188152 (76.5)             | ref              | 13752.0 (76.5)                | 188527.0 (76.7)           | ref              |
| Medium complexity                                        | 1859 (10.3)                   | 29385 (12.0)              | 0.06             | 2130.0 (11.9)                 | 29117.3 (11.8)            | 0.00             |
| Low complexity                                           | 1961 (10.9)                   | 28416 (11.6)              | 0.03             | 2099.0 (11.7)                 | 28308.7 (11.5)            | 0.01             |

<sup>a</sup>Missing values for race/ethnicity, VA priority group, driving distance to nearest VA facility, census region, rurality generated using single imputation

<sup>b</sup>Descriptive statistics and SMD after applying inverse probability of treatment weight

<sup>c</sup>SMD for categorical variables with >2 levels represented using sets of binary indicator variables (34)

<sup>d</sup>Veterans are assigned to 1 of 8 priority groups at VA enrollment based on service-connected illnesses, era of Service, and socioeconomic status determined by means testing. Priority group determines level of co-payment.

<sup>e</sup>The complexity rating is based on a VAMC's patient volume, number and breadth of physician specialists, patient case mix, intensive care unit capabilities, and degree of teaching and research.

**eTable 4.** Standardized Mean Differences for Baseline Patient- and Facility-Level Characteristics Between Veterans Who Underwent Low-Value Prostate-Specific Antigen Testing Within the US Veterans Health Administration and Medicare Before and After Inverse Probability of Treatment Weighting<sup>a</sup>

|                                                              | Unweighted                  |                                  |                  | Weighted <sup>b</sup>       |                                  |                  |
|--------------------------------------------------------------|-----------------------------|----------------------------------|------------------|-----------------------------|----------------------------------|------------------|
|                                                              | VHA PSA Group<br>(n=36,459) | Medicare PSA Group<br>(n=17,981) | SMD <sup>c</sup> | VHA PSA Group<br>(n=36,459) | Medicare PSA Group<br>(n=17,981) | SMD <sup>c</sup> |
| <b>Patient-level characteristics</b>                         |                             |                                  |                  |                             |                                  |                  |
| Age, y, mean (SD)                                            | 80.0 (4.7)                  | 81.3 (5.2)                       | 0.28             | 80.5 (5.0)                  | 80.5 (4.8)                       | 0.01             |
| Race/ethnicity, n (%)                                        |                             |                                  |                  |                             |                                  |                  |
| Hispanic                                                     | 1170 (3.2)                  | 464 (2.6)                        | 0.04             | 1093.4 (3.0)                | 537.7 (3.0)                      | 0.00             |
| Non-Hispanic black                                           | 2653 (7.3)                  | 1055 (5.9)                       | 0.06             | 2479.6 (6.8)                | 1216.4 (6.8)                     | 0.00             |
| Non-Hispanic other +<br>Multiracial                          | 812 (2.2)                   | 423 (2.4)                        | 0.01             | 823.2 (2.3)                 | 403.3 (2.2)                      | 0.00             |
| Non-Hispanic white                                           | 31824 (87.3)                | 16039 (89.2)                     | ref              | 32062.7 (87.9)              | 15823.5 (88.0)                   | ref              |
| VA priority group <sup>d</sup> , n (%)                       |                             |                                  |                  |                             |                                  |                  |
| 1                                                            | 7716 (21.2)                 | 3500 (19.5)                      | ref              | 7518.3 (20.6)               | 3728.6 (20.7)                    | ref              |
| 2                                                            | 2247 (6.2)                  | 1288 (17.2)                      | 0.10             | 2368.3 (6.5)                | 1179.5 (6.6)                     | 0.00             |
| 3                                                            | 4389 (12.0)                 | 2458 (13.7)                      | 0.10             | 4610.6 (12.7)               | 2310.9 (12.9)                    | 0.01             |
| 4                                                            | 626 (1.7)                   | 282 (1.6)                        | 0.00             | 607.1 (1.7)                 | 304.4 (1.7)                      | 0.00             |
| 5                                                            | 8369 (23.0)                 | 2355 (13.1)                      | 0.24             | 7154.7 (19.6)               | 3470.2 (19.3)                    | 0.01             |
| 6                                                            | 866 (2.4)                   | 550 (3.1)                        | 0.11             | 941.9 (2.6)                 | 466.4 (2.6)                      | 0.00             |
| 7                                                            | 1155 (3.2)                  | 828 (4.6)                        | 0.17             | 1338.5 (3.7)                | 670.8 (3.7)                      | 0.00             |
| 8                                                            | 11091 (30.4)                | 6720 (37.4)                      | 0.14             | 11919.6 (32.7)              | 5850.2 (32.5)                    | 0.01             |
| Driving distance to nearest VA<br>facility, miles, mean (SD) | 18.8 (18.8)                 | 16.6 (15.8)                      | 0.13             | 18.0 (18.1)                 | 18.0 (17.3)                      | 0.00             |
| Number of Elixhauser<br>conditions, mean (SD)                | 2.3 (2.1)                   | 3.0 (2.2)                        | 0.32             | 2.5 (2.2)                   | 2.6 (2.1)                        | 0.02             |
| HIV/AIDS, n (%)                                              | 37 (0.1)                    | 11 (0.1)                         | 0.01             | 32.3 (0.1)                  | 16.8 (0.1)                       | 0.00             |
| Alcohol use disorder                                         | 446 (1.2)                   | 194 (1.1)                        | 0.01             | 429.5 (1.2)                 | 214.6 (1.2)                      | 0.00             |
| Iron-deficiency anemia                                       | 4092 (11.2)                 | 3246 (18.1)                      | 0.19             | 4974.9 (13.7)               | 2494.4 (13.9)                    | 0.01             |
| Rheumatoid/collagen-<br>vascular disease                     | 1018 (2.8)                  | 740 (4.1)                        | 0.07             | 1193.2 (3.3)                | 601.2 (3.3)                      | 0.00             |

|                                      | Unweighted                  |                                  |                  | Weighted <sup>b</sup>       |                                  |                  |
|--------------------------------------|-----------------------------|----------------------------------|------------------|-----------------------------|----------------------------------|------------------|
|                                      | VHA PSA Group<br>(n=36,459) | Medicare PSA Group<br>(n=17,981) | SMD <sup>c</sup> | VHA PSA Group<br>(n=36,459) | Medicare PSA Group<br>(n=17,981) | SMD <sup>c</sup> |
| <b>Patient-level characteristics</b> |                             |                                  |                  |                             |                                  |                  |
| Blood loss anemia                    | 240 (0.7)                   | 197 (1.1)                        | 0.05             | 300.0 (0.8)                 | 150.0 (0.8)                      | 0.00             |
| Congestive heart failure             | 3602 (9.9)                  | 2273 (12.6)                      | 0.09             | 3970.0 (10.9)               | 2004.7 (11.2)                    | 0.01             |
| Chronic pulmonary disease            | 6312 (17.3)                 | 3678 (20.5)                      | 0.08             | 6719.2 (18.4)               | 3378.2 (18.8)                    | 0.01             |
| Coagulation deficiency               | 928 (2.6)                   | 761 (4.2)                        | 0.09             | 1135.1 (3.1)                | 571.4 (3.2)                      | 0.00             |
| Depression                           | 2665 (7.3)                  | 1434 (8.0)                       | 0.03             | 2764.4 (7.6)                | 1400.4 (7.8)                     | 0.01             |
| Diabetes without chronic conditions  | 4867 (13.4)                 | 2486 (13.8)                      | 0.01             | 4915.4 (13.5)               | 2426.5 (13.5)                    | 0.00             |
| Diabetes with chronic conditions     | 7064 (19.4)                 | 4213 (23.4)                      | 0.10             | 7596.5 (20.8)               | 3792.1 (21.1)                    | 0.01             |
| Drug abuse                           | 151 (0.4)                   | 65 (0.4)                         | 0.01             | 146.0 (0.4)                 | 74.2 (0.4)                       | 0.00             |
| Uncomplicated hypertension           | 18699 (51.3)                | 11206 (62.3)                     | 0.22             | 20031.3 (54.9)              | 9958.9 (55.4)                    | 0.01             |
| Complicated hypertension             | 4589 (12.6)                 | 3122 (17.4)                      | 0.13             | 5227.6 (14.3)               | 2642.9 (14.7)                    | 0.01             |
| Hypothyroidism                       | 3836 (10.5)                 | 2999 (16.7)                      | 0.18             | 4634.8 (12.7)               | 2337.0 (13.0)                    | 0.01             |
| Liver disease                        | 516 (1.4)                   | 330 (1.8)                        | 0.03             | 566.5 (1.6)                 | 277.6 (1.5)                      | 0.00             |
| Lymphoma                             | 389 (1.1)                   | 231 (1.3)                        | 0.02             | 426.0 (1.2)                 | 217.6 (1.2)                      | 0.00             |
| Fluid and electrolyte disorder       | 2416 (6.6)                  | 1593 (8.9)                       | 0.08             | 2709.3 (7.4)                | 1366.4 (7.6)                     | 0.01             |
| Metastatic cancer                    | 150 (0.4)                   | 94 (0.5)                         | 0.02             | 168.2 (0.5)                 | 86.4 (0.5)                       | 0.00             |
| Other neurologic disorder            | 2842 (7.8)                  | 1804 (10.0)                      | 0.08             | 3135.7 (8.6)                | 1568.9 (8.7)                     | 0.00             |
| Obesity                              | 3147 (8.6)                  | 2168 (12.1)                      | 0.11             | 3595.9 (9.9)                | 1804.7 (10.0)                    | 0.01             |
| Paralysis                            | 491 (1.4)                   | 279 (1.6)                        | 0.02             | 510.7 (1.4)                 | 256.1 (1.4)                      | 0.00             |
| Peripheral vascular disease          | 4327 (11.9)                 | 3261 (18.1)                      | 0.18             | 5133.1 (14.1)               | 2557.0 (14.2)                    | 0.00             |
| Psychosis                            | 600 (1.7)                   | 313 (1.7)                        | 0.01             | 608.8 (1.7)                 | 302.1 (1.7)                      | 0.00             |
| Pulmonary circulation disorder       | 415 (1.1)                   | 230 (1.3)                        | 0.01             | 441.1 (1.2)                 | 266.5 (1.3)                      | 0.00             |
| Renal failure                        | 4586 (12.6)                 | 3187 (17.7)                      | 0.14             | 5279.8 (14.5)               | 2641.8 (14.7)                    | 0.01             |
| Solid tumor without metastasis       | 1140 (3.1)                  | 658 (3.7)                        | 0.03             | 1215.1 (3.3)                | 602.8 (3.4)                      | 0.00             |

|                                                          | Unweighted               |                               |                  | Weighted <sup>b</sup>    |                               |                  |
|----------------------------------------------------------|--------------------------|-------------------------------|------------------|--------------------------|-------------------------------|------------------|
|                                                          | VHA PSA Group (n=36,459) | Medicare PSA Group (n=17,981) | SMD <sup>c</sup> | VHA PSA Group (n=36,459) | Medicare PSA Group (n=17,981) | SMD <sup>c</sup> |
| <b>Patient-level characteristics</b>                     |                          |                               |                  |                          |                               |                  |
| Peptic ulcer disease                                     | 224 (0.6)                | 135 (99.3)                    | 0.02             | 241.8 (0.7)              | 120.2 (0.7)                   | 0.00             |
| Valvular disease                                         | 2910 (8.0)               | 2180 (12.1)                   | 0.14             | 3447.4 (9.5)             | 1733.2 (9.6)                  | 0.01             |
| Weight loss                                              | 688 (1.9)                | 393 (2.2)                     | 0.02             | 735.7 (2.0)              | 377.6 (2.1)                   | 0.01             |
| <b>Facility-level characteristics</b>                    |                          |                               |                  |                          |                               |                  |
| Academic affiliation, yes, n (%)                         | 35663 (97.8)             | 17719 (98.5)                  | 0.05             | 35754.8 (98.1)           | 17641.2 (98.1)                | 0.00             |
| Facility size, total # outpatient visits FY18, mean (SD) | 755774 (437479)          | 788769 (419935)               | 0.08             | 768551.6 (437350.3)      | 772056.5 (421867.8)           | 0.01             |
| Census region, n (%)                                     |                          |                               |                  |                          |                               |                  |
| Northeast                                                | 3502 (9.6)               | 2917 (16.2)                   | ref              | 4333.5 (11.9)            | 2128.4 (11.8)                 | ref              |
| Midwest                                                  | 8402 (23.1)              | 3812 (21.2)                   | 0.29             | 8174.0 (22.4)            | 4056.6 (22.6)                 | 0.00             |
| South                                                    | 17752 (48.7)             | 8505 (47.3)                   | 0.22             | 17560.0 (48.3)           | 8736.4 (48.6)                 | 0.00             |
| West                                                     | 6803 (18.7)              | 2747 (15.3)                   | 0.36             | 6351.6 (17.4)            | 3059.7 (17.0)                 | 0.01             |
| Rurality, n (%)                                          |                          |                               |                  |                          |                               |                  |
| Large metropolitan                                       | 9938 (27.3)              | 6685 (37.3)                   | ref              | 11151.4 (30.6)           | 5489.7 (30.5)                 | ref              |
| Small metropolitan                                       | 14582 (40.0)             | 7031 (39.2)                   | 0.17             | 14499.9 (39.8)           | 7143.0 (39.7)                 | 0.00             |
| Micropolitan                                             | 6222 (17.1)              | 2441 (13.6)                   | 0.25             | 5811.7 (15.9)            | 2890.6 (16.1)                 | 0.00             |
| Noncore rural                                            | 5687 (15.6)              | 1789 (10.0)                   | 0.34             | 4995.9 (13.7)            | 2457.8 (13.7)                 | 0.00             |
| Facility complexity level <sup>e</sup> , n (%)           |                          |                               |                  |                          |                               |                  |
| High complexity                                          | 26709 (73.3)             | 14161 (78.8)                  | ref              | 27407.2 (75.2)           | 13547.1 (75.3)                | ref              |
| Medium complexity                                        | 4587 (12.6)              | 1859 (10.3)                   | 0.09             | 4307.5 (11.8)            | 2107.4 (11.7)                 | 0.00             |
| Low complexity                                           | 5163 (14.2)              | 1961 (10.9)                   | 0.12             | 4744.3 (13.0)            | 2326.5 (12.9)                 | 0.00             |

<sup>a</sup>Missing values for race/ethnicity, VA priority group, driving distance to nearest VA facility, census region, rurality generated using single imputation

<sup>b</sup>Descriptive statistics and SMD after applying inverse probability of treatment weight

<sup>c</sup>SMD for categorical variables with >2 levels represented using sets of binary indicator variables<sup>34</sup>

<sup>d</sup>Veterans are assigned to 1 of 8 priority groups at VA enrollment based on service-connected illnesses, era of Service, and socioeconomic status determined by means testing. Priority group determines level of co-payment.

<sup>e</sup>The complexity rating is based on a VAMC's patient volume, number and breadth of physician specialists, patient case mix, intensive care unit capabilities, and degree of teaching and research.

**eTable 5.** Difference in Use of Potential Cascade Services in Veterans Aged Older than 83 Years Who Received Low-Value Prostate-Specific Antigen Testing Within the US Veterans Health Administration Versus Those Who Did Not Receive Low-Value PSA Testing

| Cascade services                      | Unadjusted Rate per 100 Veterans |                           | Unadjusted Difference in Rate per 100 Veterans <sup>a</sup> | Adjusted Difference in rate per 100 Veterans (95% CI) <sup>b</sup> |
|---------------------------------------|----------------------------------|---------------------------|-------------------------------------------------------------|--------------------------------------------------------------------|
|                                       | VHA PSA Group (n=8,211)          | Control Group (n=110,956) |                                                             |                                                                    |
| Total cascade services                | 46.9                             | 12.9                      | 34.0                                                        | 32.8 (29.9-35.8)                                                   |
| Additional PSA test                   | 16.6                             | 3.2                       | 13.0                                                        | 12.8 (11.3-14.3)                                                   |
| Related outpatient visit <sup>c</sup> | 12.3                             | 1.5                       | 10.8                                                        | 10.6 (8.9-12.2)                                                    |
| Urology visit                         | 15.5                             | 7.8                       | 7.7                                                         | 7.6 (5.9-9.3)                                                      |
| Prostate imaging                      | 1.2                              | 0.4                       | 0.8                                                         | 0.7 (0.5-1.0)                                                      |
| Prostate biopsy                       | 0.2                              | 0.02                      | 0.2                                                         | 0.2 (0.1-0.3)                                                      |
| Androgen deprivation therapy          | 0.7                              | 0.04                      | 0.7                                                         | 0.6 (0.3-0.9)                                                      |
| Surgical procedure <sup>d</sup>       | <0.2 <sup>e</sup>                | <0.2 <sup>e</sup>         | <0.2 <sup>e</sup>                                           | -                                                                  |
| Radiation therapy <sup>f</sup>        | 0.4                              | 0.04                      | 0.4                                                         | 0.3 (-0.1-0.7)                                                     |

VHA, Veterans Health Administration

<sup>a</sup>Determined by subtracting rate of potential cascade services per 100 Veterans in those who did not receive low-value PSA testing from those who received low-value PSA within VHA

<sup>b</sup>Adjusted for patient and VA Medical Center-level covariates (age, race/ethnicity, VA priority group, driving distance to nearest VA, number of Elixhauser conditions, individual Elixhauser conditions, academic affiliation, facility size, census region, rurality, complexity level) using inverse probability of treatment weighting

<sup>c</sup>Outpatient visit or consultation with primary diagnosis of prostate cancer or elevated PSA

<sup>d</sup>Prostatectomy or surgical resection of prostate.

<sup>e</sup>Cell size suppressed due to data use agreements

<sup>f</sup>Contact radiation, beam radiation, insertion of radioactive element, brachytherapy, intraoperative radiation therapy, plaque radiation of prostate

**eTable 6.** Difference in Use of Potential Cascade Services in Veterans Aged Older than 83 Years Who Received Low-Value Prostate-Specific Antigen Testing Within Medicare Versus Those Who Did Not Receive Low-Value PSA Testing

| Cascade services                      | Unadjusted Rate per 100 Veterans |                           | Unadjusted Difference in Rate per 100 Veterans <sup>a</sup> | Adjusted Difference in rate per 100 Veterans (95% CI) <sup>b</sup> |
|---------------------------------------|----------------------------------|---------------------------|-------------------------------------------------------------|--------------------------------------------------------------------|
|                                       | Medicare PSA Group (n=5,787)     | Control Group (n=110,956) |                                                             |                                                                    |
| Total cascade services                | 51.6                             | 12.9                      | 38.7                                                        | 38.5 (35.2-41.7)                                                   |
| Additional PSA test                   | 15.4                             | 3.2                       | 12.2                                                        | 11.9 (10.8-13.0)                                                   |
| Related outpatient visit <sup>c</sup> | 9.1                              | 1.5                       | 7.6                                                         | 8.0 (6.6-9.4)                                                      |
| Urology visit                         | 25.1                             | 7.8                       | 17.3                                                        | 16.8 (15.3-18.4)                                                   |
| Prostate imaging                      | 0.3                              | 0.4                       | -0.1                                                        | -0.09 (-0.17- -0.01)                                               |
| Prostate biopsy                       | 0.5                              | 0.02                      | 0.5                                                         | 0.5 (0.3-0.8)                                                      |
| Androgen deprivation therapy          | 0.8                              | 0.04                      | 0.7                                                         | 0.9 (0.4-1.4)                                                      |
| Surgical procedure <sup>d</sup>       | <0.2 <sup>e</sup>                | <0.2 <sup>e</sup>         | <0.2 <sup>e</sup>                                           | -                                                                  |
| Radiation therapy <sup>f</sup>        | 0.4                              | 0.04                      | 0.4                                                         | 0.36 (0.04-0.67)                                                   |

<sup>a</sup>Determined by subtracting rate of potential cascade services per 100 Veterans in those who did not receive low-value PSA testing from those who received low-value PSA within Medicare

<sup>b</sup>Adjusted for patient and VA Medical Center-level covariates (age, race/ethnicity, VA priority group, driving distance to nearest VA, number of Elixhauser conditions, individual Elixhauser conditions, academic affiliation, facility size, census region, rurality, complexity level) using inverse probability of treatment weighting

<sup>c</sup>Outpatient visit or consultation with primary diagnosis of prostate cancer or elevated PSA

<sup>d</sup>Prostatectomy or surgical resection of prostate.

<sup>e</sup>Cell size suppressed due to data use agreements

<sup>f</sup>Contact radiation, beam radiation, insertion of radioactive element, brachytherapy, intraoperative radiation therapy, plaque radiation of prostate



**eTable 7.** Difference in Use of Potential Cascade Services in Veterans Aged Older than 83 Years Who Received Low-Value Prostate-Specific Antigen Testing Within Medicare Versus Those Who Received Low-Value PSA Testing Within the US Veterans Health Administration

| Cascade services                      | Unadjusted Rate per 100 Veterans |                         | Unadjusted Difference in Rate per 100 Veterans <sup>a</sup> | Adjusted Difference in rate per 100 Veterans (95% CI) <sup>b</sup> |
|---------------------------------------|----------------------------------|-------------------------|-------------------------------------------------------------|--------------------------------------------------------------------|
|                                       | Medicare PSA Group (n=5,787)     | VHA PSA Group (n=8,211) |                                                             |                                                                    |
| Total cascade services                | 51.6                             | 46.9                    | 4.7                                                         | 5.6 (5.2-6.0)                                                      |
| Additional PSA test                   | 15.4                             | 16.6                    | -1.2                                                        | -1.0 (-0.8- -1.1)                                                  |
| Related outpatient visit <sup>c</sup> | 9.1                              | 12.3                    | -3.2                                                        | -2.6 (-2.7- -2.6)                                                  |
| Urology visit                         | 25.1                             | 15.5                    | 9.6                                                         | 9.5 (9.3-9.6)                                                      |
| Prostate imaging                      | 0.3                              | 1.2                     | -0.9                                                        | -0.9 (-0.7- -1.0)                                                  |
| Prostate biopsy                       | 0.5                              | 0.2                     | 0.3                                                         | 0.3 (0.2-0.5)                                                      |
| Androgen deprivation therapy          | 0.8                              | 0.7                     | 0.1                                                         | 0.2 (0.1-0.4)                                                      |
| Surgical procedure <sup>d</sup>       | <0.2 <sup>e</sup>                | <0.2 <sup>e</sup>       | <0.2 <sup>e</sup>                                           | -                                                                  |
| Radiation therapy <sup>f</sup>        | 0.43                             | 0.35                    | 0.1                                                         | 0.04 (-0.08-0.16)                                                  |

VHA, Veterans Health Administration

<sup>a</sup>Determined by subtracting rate of potential cascade services per 100 Veterans in those who received low-value PSA within VHA from those who received low-value PSA testing within Medicare

<sup>b</sup>Adjusted for patient and VA Medical Center-level covariates (age, race/ethnicity, VA priority group, driving distance to nearest VA, number of Elixhauser conditions, individual Elixhauser conditions, academic affiliation, facility size, census region, rurality, complexity level) using inverse probability of treatment weighting

<sup>c</sup>Outpatient visit or consultation with primary diagnosis of prostate cancer or elevated PSA

<sup>d</sup>Prostatectomy or surgical resection of prostate.

<sup>e</sup>Cell size suppressed due to data use agreements

<sup>f</sup>Contact radiation, beam radiation, insertion of radioactive element, brachytherapy, intraoperative radiation therapy, plaque radiation of prostate

**eTable 8. Rates of Potential Cascade Services After Low-Value Prostate-Specific Antigen Testing by Health Care System**

|                                       | Location of index PSA test       |                   |                                  |                   |
|---------------------------------------|----------------------------------|-------------------|----------------------------------|-------------------|
|                                       | VHA PSA Group<br>(n=36,459)      |                   | Medicare PSA Group<br>(n=17,981) |                   |
|                                       | Unadjusted rate per 100 Veterans |                   |                                  |                   |
| Location of care cascade service      | VHA                              | Medicare          | VHA                              | Medicare          |
| Total cascade services                | 35.0                             | 10.2              | 13.8                             | 40.1              |
| Subsequent PSA test                   | 15.8                             | 2.9               | 10.6                             | 9.7               |
| Related outpatient visit <sup>a</sup> | 8.5                              | 1.5               | 1.8                              | 6.3               |
| Urology visit                         | 8.9                              | 5.3               | 1.2                              | 22.0              |
| Prostate imaging                      | 1.2                              | <0.1 <sup>b</sup> | 0.2                              | 0.1               |
| Prostate biopsy                       | 0.3                              | 0.2               | <0.1 <sup>b</sup>                | 0.7               |
| Androgen deprivation therapy          | 0.3                              | 0.1               | <0.1 <sup>b</sup>                | 0.5               |
| Surgical procedure <sup>c</sup>       | <0.1 <sup>b</sup>                | <0.1 <sup>b</sup> | <0.1 <sup>b</sup>                | <0.1 <sup>b</sup> |
| Radiation therapy <sup>d</sup>        | 0.1                              | 0.2               | <0.1 <sup>b</sup>                | 0.8               |

VHA, Veterans Health Administration

<sup>a</sup>Outpatient visit or consultation with primary diagnosis of prostate cancer or elevated PSA

<sup>b</sup>Cell size suppressed due to Medicare data use agreement

<sup>c</sup>Prostatectomy or surgical resection of prostate

<sup>d</sup>Contact radiation, beam radiation, insertion of radioactive element, brachytherapy, intraoperative radiation therapy, plaque radiation of prostate
