# Supplementary material for: Assessment of Care Cascades Following Low-Value Prostate-Specific Antigen Testing Among Veterans Dually Enrolled in the US Veterans Health Administration and Medicare Systems
Source: PubMed Central journal article supplement (PMC9856440; doi:10.1001/jamanetworkopen.2022.47180), 2022-12-15
Supplement: jamanetwopen-e2247180-s002.pdf [file jamanetwopen-e2247180-s002.pdf]

## Data Sharing Statement

Pickering. Assessment of Care Cascades Following Low-Value Prostate-Specific Antigen Testing Among Veterans Dually Enrolled in the US Veterans Health Administration and Medicare Systems. *JAMA Netw Open*. Published December 15, 2022.  
doi:10.1001/jamanetworkopen.2022.47180

### Data

**Data available:** No
